# Supplementary material for: Physical Properties Investigation of Reduced Graphene Oxide Thin Films Prepared by Material Inkjet Printing
Source: Hindawi journal article supplement (doi:10.1155/2017/3501903), 2017-01-01
Supplement: f1 [file 3501903.f1.pdf]

## Supplementary Information

### s.1

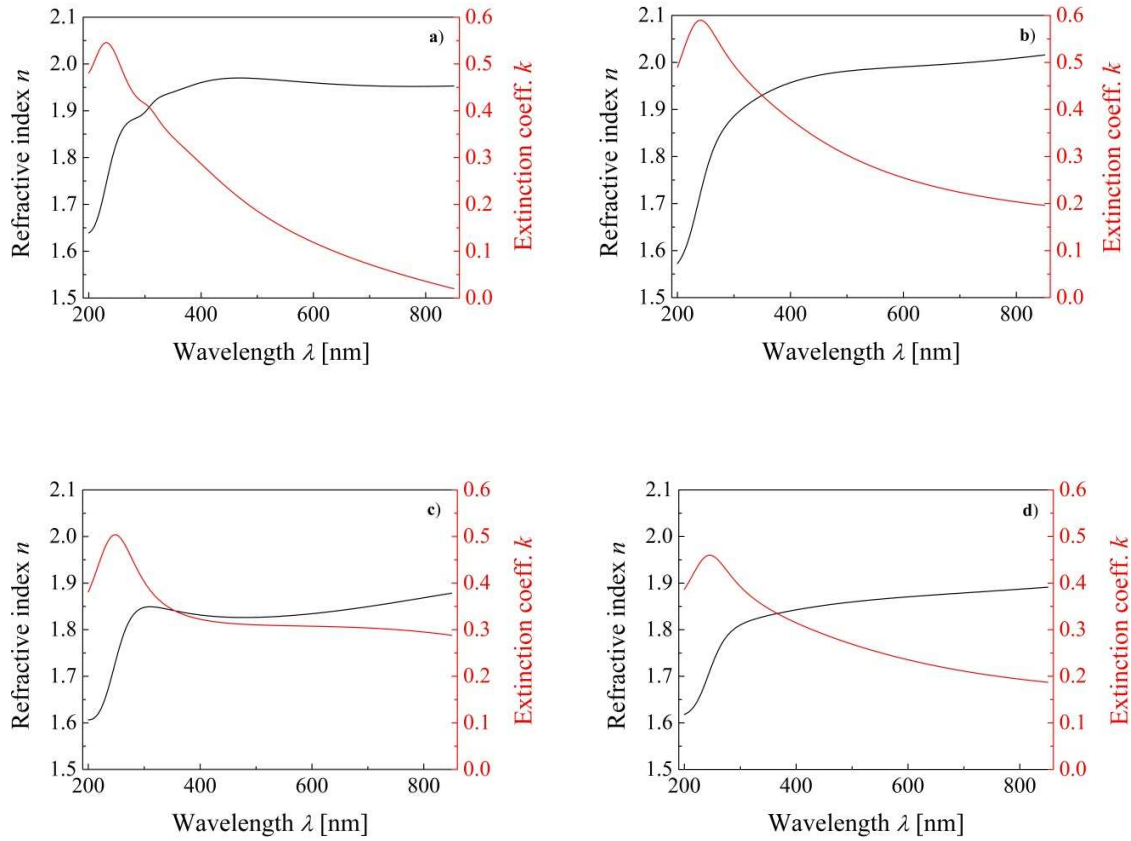

**Fig. S1:** Dependencies of refractive index and extinction coefficient spectra of a thin film: a) GO, b) the thermal reduced GO, c) the chemical reduced GO and d) UV reduced GO

**Table S1:** Mean square error of the parameter sample fits

| Material                 | MSE   |
|--------------------------|-------|
| Graphene oxide           | 0.020 |
| Chemical reduction of GO | 0.013 |
| Thermal reduction of GO  | 0.014 |
| UV reduction of GO       | 0.031 |

### s.2: Organic solar cells preparation and characterization:

Pre-patterned glass/ITO substrates were preliminary cleaned in ultrasonic bath firstly in the 5% NaOH solution at room temperature, then rinsed in water and consequently washed twice in deionized water and then cleaned in acetone to remove residual water. Finally, ultrasonic treatment in isopropanol bath was

applied for 10 minutes. First layer, GO (thickness of 5 nm), was deposited by material inkjet printer and then reduced in 3 ways (chemically, thermally, UV).

DPP(TBFu)<sub>2</sub>:PC<sub>60</sub>BM heterojunction layer was deposited on GO/rGO layer by dynamic spin coating dropping 25 µl of the prepared solution on pre-rotated at 2500 rpm substrates for 40 seconds. Thickness of all the active layers measured by the Dektak XT profilometer was in a range of (100 ± 10) nm. Finally, 200 nm Al electrodes were deposited. After that step, to operate the solar cells in the ambient environment, devices were encapsulated with glass slides and Ossila epoxy resin and treated by UV lamp for 30 minutes.

The final structure of the prepared BHJ OSC with a hole-extracting GO/rGO layer (thickness of 5 nm) can be seen in figure S2. OSC with a hole-extracting PEDOT:PSS (instead of GO/rGO) layer was designated as the reference.

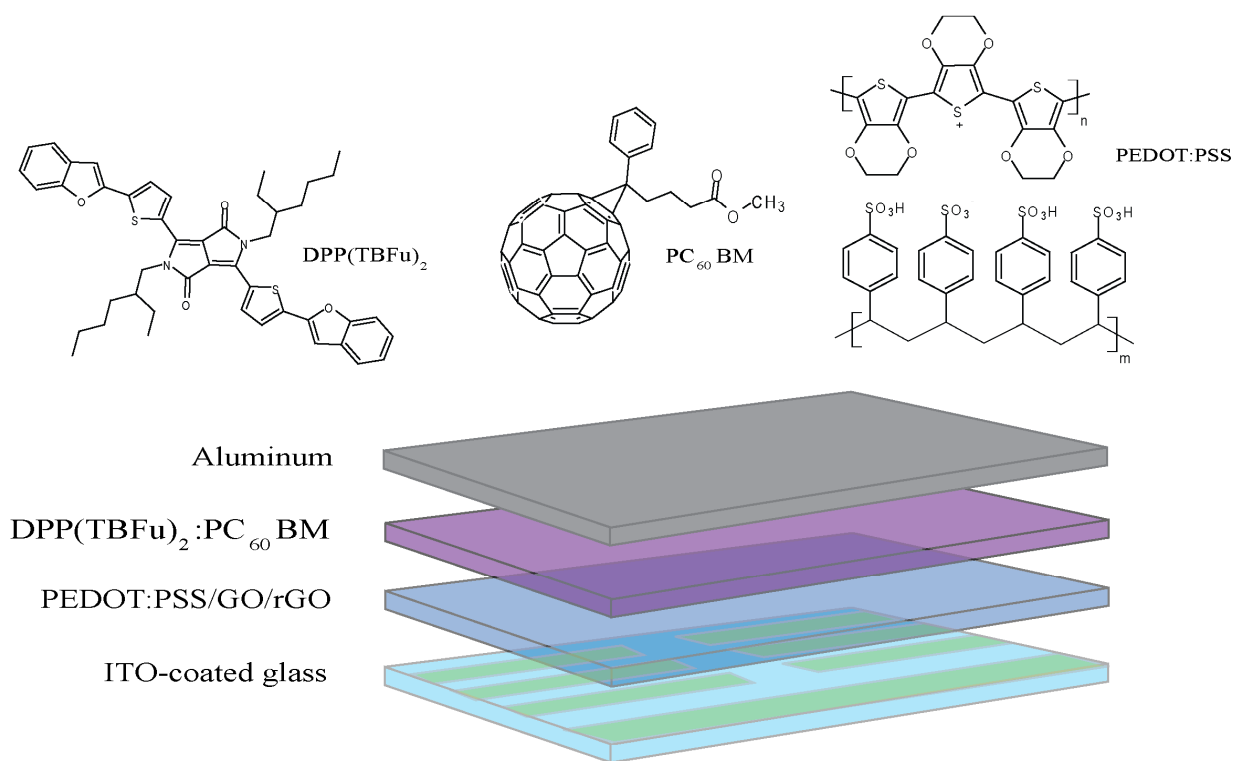

**Fig. S2:** The final structure of organic solar cells with bulk heterojunction

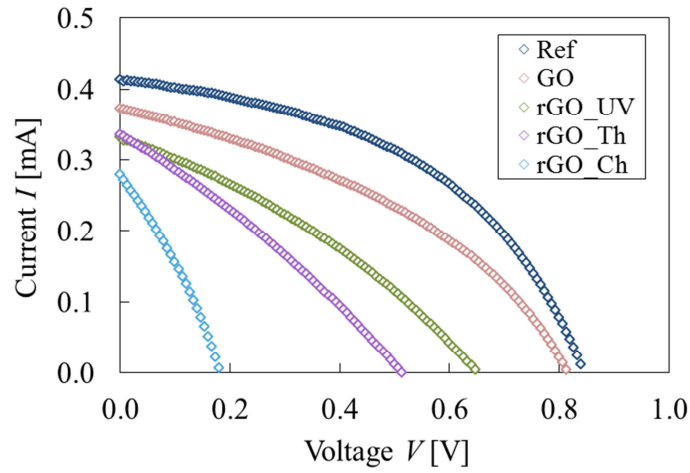

**Fig. S2.2:** The influence of hole-extraction GO layer and its reduction of I-V characteristics

**Table S2:** Basic photovoltaic parameters of prepared organic solar cell with bulk heterojunction

| Structure                | $j_{sc}^*$ (mA/cm <sup>2</sup> ) | $V_{oc}^*$ (mV) | $FF^*$ (%) | $PCE$ (%) |
|--------------------------|----------------------------------|-----------------|------------|-----------|
| Reference                | 8.8                              | 844.3           | 46.1       | 3.4       |
| Graphene oxide           | 8.2                              | 828.0           | 38.7       | 2.6       |
| Chemical reduction of GO | 7.2                              | 650.8           | 32.7       | 1.5       |
| Thermal reduction of GO  | 7.3                              | 532.2           | 29.5       | 1.1       |
| UV reduction of GO       | 7.0                              | 182.4           | 30.7       | 0.4       |

\*short circuit current ( $j_{sc}$ ), open circuit voltage ( $V_{oc}$ ) and fill factor ( $FF$ )
